## ■ CORRESPONDENCE

Anesthesiology  
1997; 87:449  
© 1997 American Society of Anesthesiologists, Inc.  
Lippincott-Raven Publishers

### The Use of a Nasogastric Tube as an Aid in Blind Nasotracheal Intubation: A Postscript

*To the Editor*—We would like to propose an improvement to our original method of intubation presented in 1992.<sup>1</sup> We originally proposed first inserting an endotracheal tube into the esophagus, then pulling the tube back into the pharynx until breath sounds are audible. The cuff is then inflated, and<sup>2,3</sup> the nasogastric tube is passed into the larynx through the endotracheal tube. At this point, the Rusch tube can be inserted into the trachea together with the nasogastric tube after deflating the cuff. Now we would like to recommend an alteration for situation in which the nasogastric tube is mistakenly inserted into the esophagus. When this occurs the endotracheal tube cuff should be deflated, the tube advanced into the esophagus, and rotated approximately 180°. It should then be withdrawn until breath sounds are heard, and the nasogastric tube is then reinserted. We emphasize the importance of rotating of Rusch endotracheal tube in the esophagus because most failures may occur when the tip of the endotracheal tube, when drawn back from the esophagus, is located on the improper side of the pharynx to permit passage of the nasogastric tube. Following this recommendation, we have found the success rate to be greatly improved.

Anesthesiology  
1997; 87:449-450  
© 1997 American Society of Anesthesiologists, Inc.  
Lippincott-Raven Publishers

### Suction Catheter-guided Nasotracheal Intubation

*To the Editor*—Despite the popularity of fiberoptic bronchoscope for nasotracheal intubation, "blind nasal" intubation still remains a necessary technique in maintaining an airway in certain conditions.<sup>1,2</sup> Although various methods and devices have been developed, most of the concerns are focused on the safety of operators without considering the trauma to the patients.<sup>3-7</sup>

We would like to present a simple, easy, inexpensive technique that would be more favorable for the patient and the operator. The whole process takes only a few minutes and is faster than placing the fiberoptic bronchoscope. It is an ideal technique for the patients on whom the use of fiberoptic bronchoscope is impossible because of copious bloody secretions.

The patient is prepared for an awake intubation as described elsewhere.<sup>1,2</sup> An appropriate size of endotracheal tube is inserted through the nostril until the tip of the endotracheal tube reaches the oropharynx where the nonturbulent smooth breathe sounds can be heard. At that point, instead of directly passing the endotracheal tube into the larynx blindly as the conventional method describes, a soft suction catheter is inserted (Professional Medical Products, Inc, Suction Catheter with control port, 14-French TM) through the tube into the trachea. The predetermined length of the catheter is advanced to reach the end of the endotracheal tube. The patient is asked to take deep respirations, and the catheter tip is advanced slowly while

**Naoki Sugiura, D.D.S.**  
Department of Oral and Maxillofacial surgery  
**Morimasa Yamada, M.D., D.D.S.**  
**Motoshi Kainuma, M.D.**  
**Toshiyuki Miyake, M.D.**  
Department of Anesthesiology  
Fujita Health University School of Medicine  
Toyoake, Aichi 470-11, Japan

#### References

1. Sugiura N, Miyake T: The use of a nasogastric tube as an aid in blind nasotracheal intubation. *ANESTHESIOLOGY* 1992; 77:613-4
2. Gorbach MS: Inflation of endotracheal tube cuff as an aid to blind nasal endotracheal intubation. *Anesthesia Analg* 1987; 66:913-22
3. Van Elstraete AC, Pennant JH, Gajraj NM, Victory RA: Tracheal tube cuff inflation as an aid to blind nasotracheal intubation. *Br J Anaesth* 1993; 70:691-3

(Accepted for publication March 31, 1997.)

applying gentle suction. The catheter tip will go into the trachea easily. After the catheter tip is advanced >10 cm from the tip of the endotracheal tube, the catheter is connected to the gas sampling tubing of the capnograph, and the control port is sealed. The capnograph confirms the placement of the catheter tip in the trachea with reassuring CO<sub>2</sub> wave forms. If the catheter tip is placed in the esophagus, very small (if any) CO<sub>2</sub> wave forms will be noticed on the capnograph. The operator will also feel more resistance as the catheter tip passes through the esophagus. If the patient has not been adequately topicalized, the patient will cough as the tip of the catheter approaches the glottis. The operator also may feel some degree of resistance while advancing the catheter through the glottis. Once the catheter tip is placed in the trachea, the endotracheal tube can be passed over the catheter to the trachea using the Seldinger technique.

Reasons for successful placement of the catheter in the trachea appear to be as follows:

First, the nasopharyngeal route is a natural airway; air passes directly from *via* the oropharynx to the trachea. This explains why a nasogastric tube, intended to be placed in the esophagus, often goes to the trachea and why a fiberoptic bronchoscope inserted through the nasopharyngeal route often enters the trachea without much guidance. Second, we have noticed that while working to clear copious bloody secretions under direct laryngoscopy for difficult intuba-
